# Supplementary material
Source: publisher figshare collection journal article supplement (https://karger.figshare.com/ndownloader/files/15102842)

**Single-field Non-mydratic Fundus Photography for Diabetic  
Retinopathy Screening: A Systematic Review and  
Meta-analysis**

**Running head: Effectiveness of single filed NMFP in DR  
screening**

Jiying Hu<sup>1</sup>, Ruiting Chen<sup>1</sup>, Ying Lu<sup>1</sup>, Baikang Ye<sup>2</sup>, Xiaoyan Dou<sup>2</sup>,  
Zhiming Cai<sup>1</sup>, Zuhui Pu<sup>1\*</sup>, Lisha Mou<sup>1\*</sup>

<sup>1</sup> Evidence Based Medicine Center, Institute of Translational Medicine, Shenzhen University Health Science Center, Shenzhen University School of Medicine, First Affiliated Hospital of Shenzhen University, Shenzhen Second People's Hospital, Shenzhen, Guangdong, 518035, China

<sup>2</sup> Department of Ophthalmology, Shenzhen University School of Medicine, First Affiliated Hospital of Shenzhen University, Shenzhen Second People's Hospital, Shenzhen, Guangdong, 518035, China

\*Corresponding Author

Full name: Zuhui Pu and Lisha Mou

Institute: Evidence Based Medicine Center, Institute of Translational Medicine

Department: Shenzhen University School of Medicine

University/Hospital: Shenzhen Second People's Hospital, First Affiliated Hospital of Shenzhen University

Street Name & Number: NO.3002 Sungang Road, Futian district, Shenzhen, China

City, State, Postal code, Country: Shenzhen, Guangdong, 518035, China

Tel: (086) 0755-83366388-3230

Fax: (086) 0755-83366388-3230

E-mail: pupeter190@163.com (Z. P.), lishamou@gmail.com (L. M.)

Key words: Non-mydratic fundus photography, diabetic retinopathy, diagnostic effectiveness.

## **Figure legend**

**eFigure 1.** Assessment of methodological quality based on the QUADAS-2 method (patient selection, index test, reference standard, and timing flow) for each study (upper) and all the combining studies (bottom). Risk of bias summary and applicability concerns assessments: green, low risk; red, high risk; and yellow, unclear risk.

**eFigure 2.** Forest plots of pooled sensitivity specificity for single-field NMFP in DR detection with 95% CIs.

**eFigure 3.** Publication bias of the included studies.

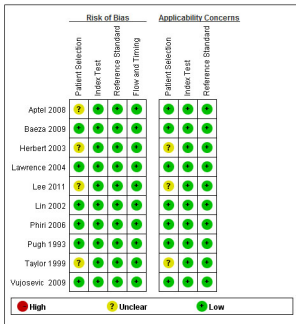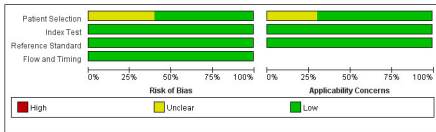

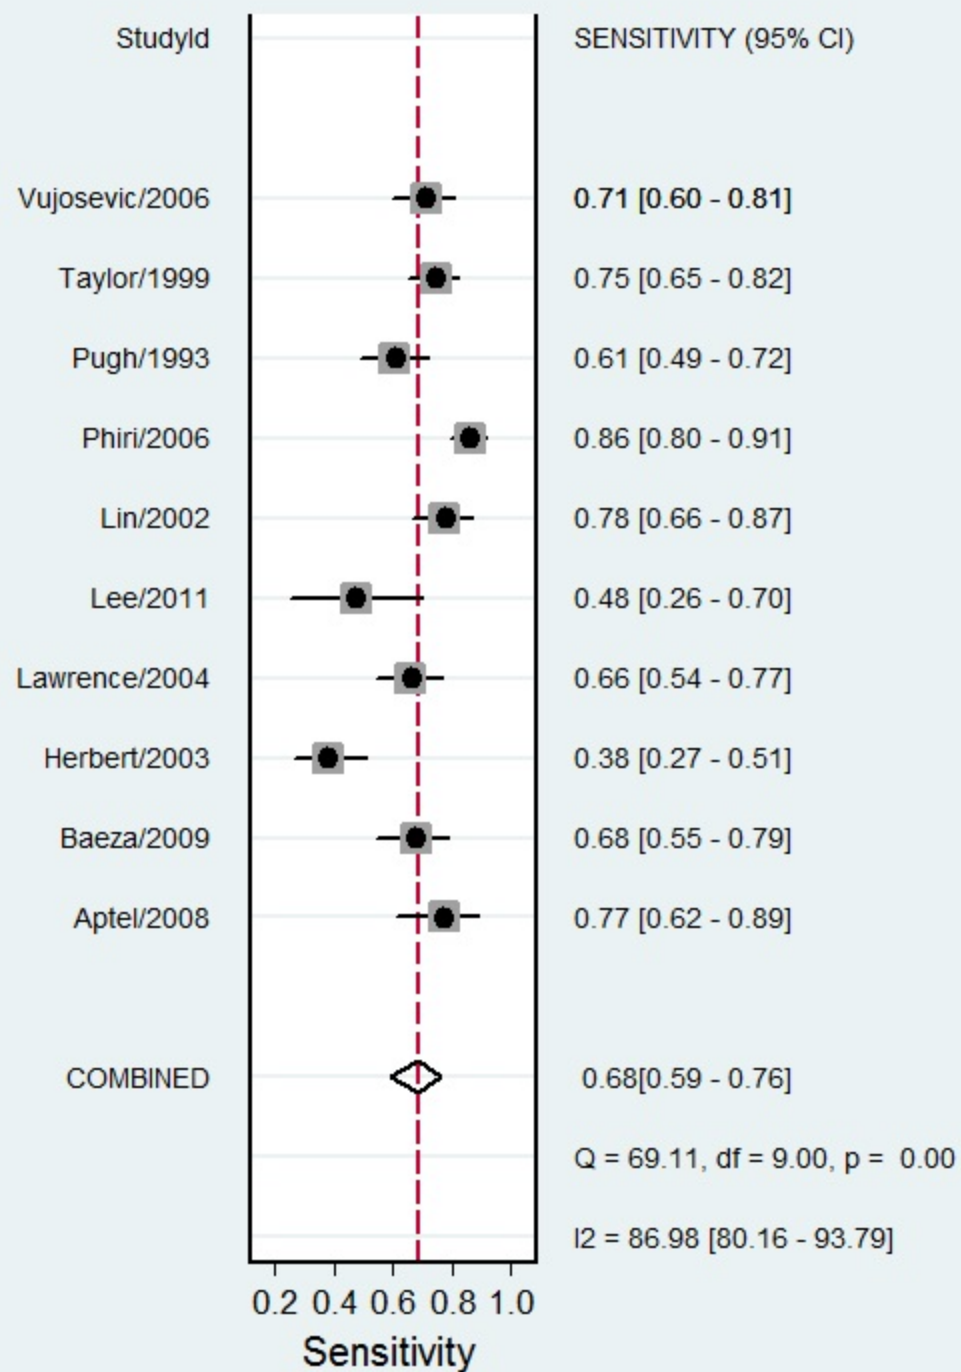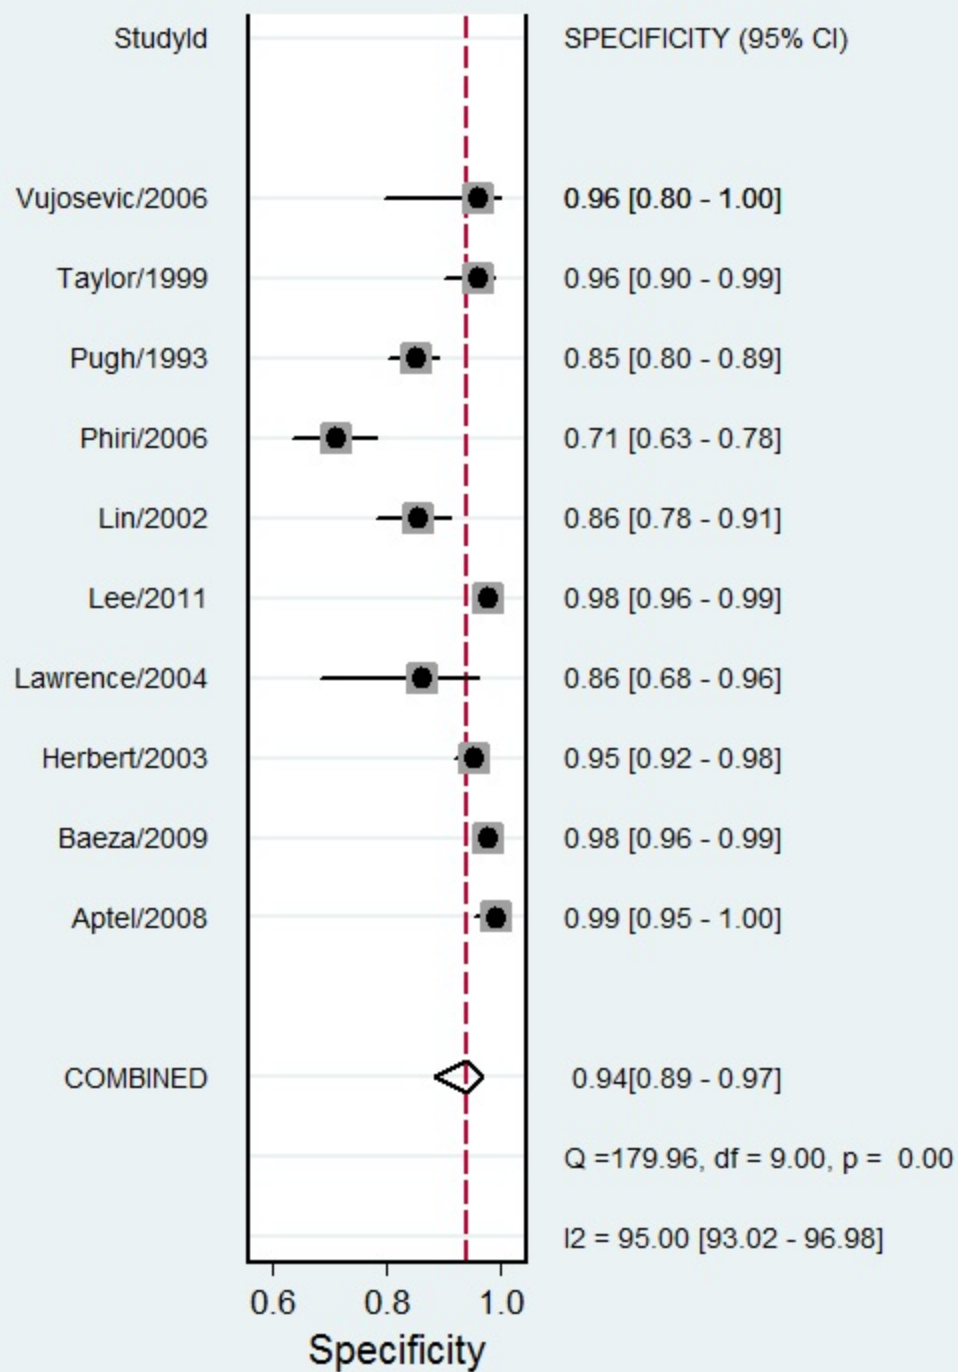

Deeks' Funnel Plot Asymmetry Test  
pvalue = 0.39

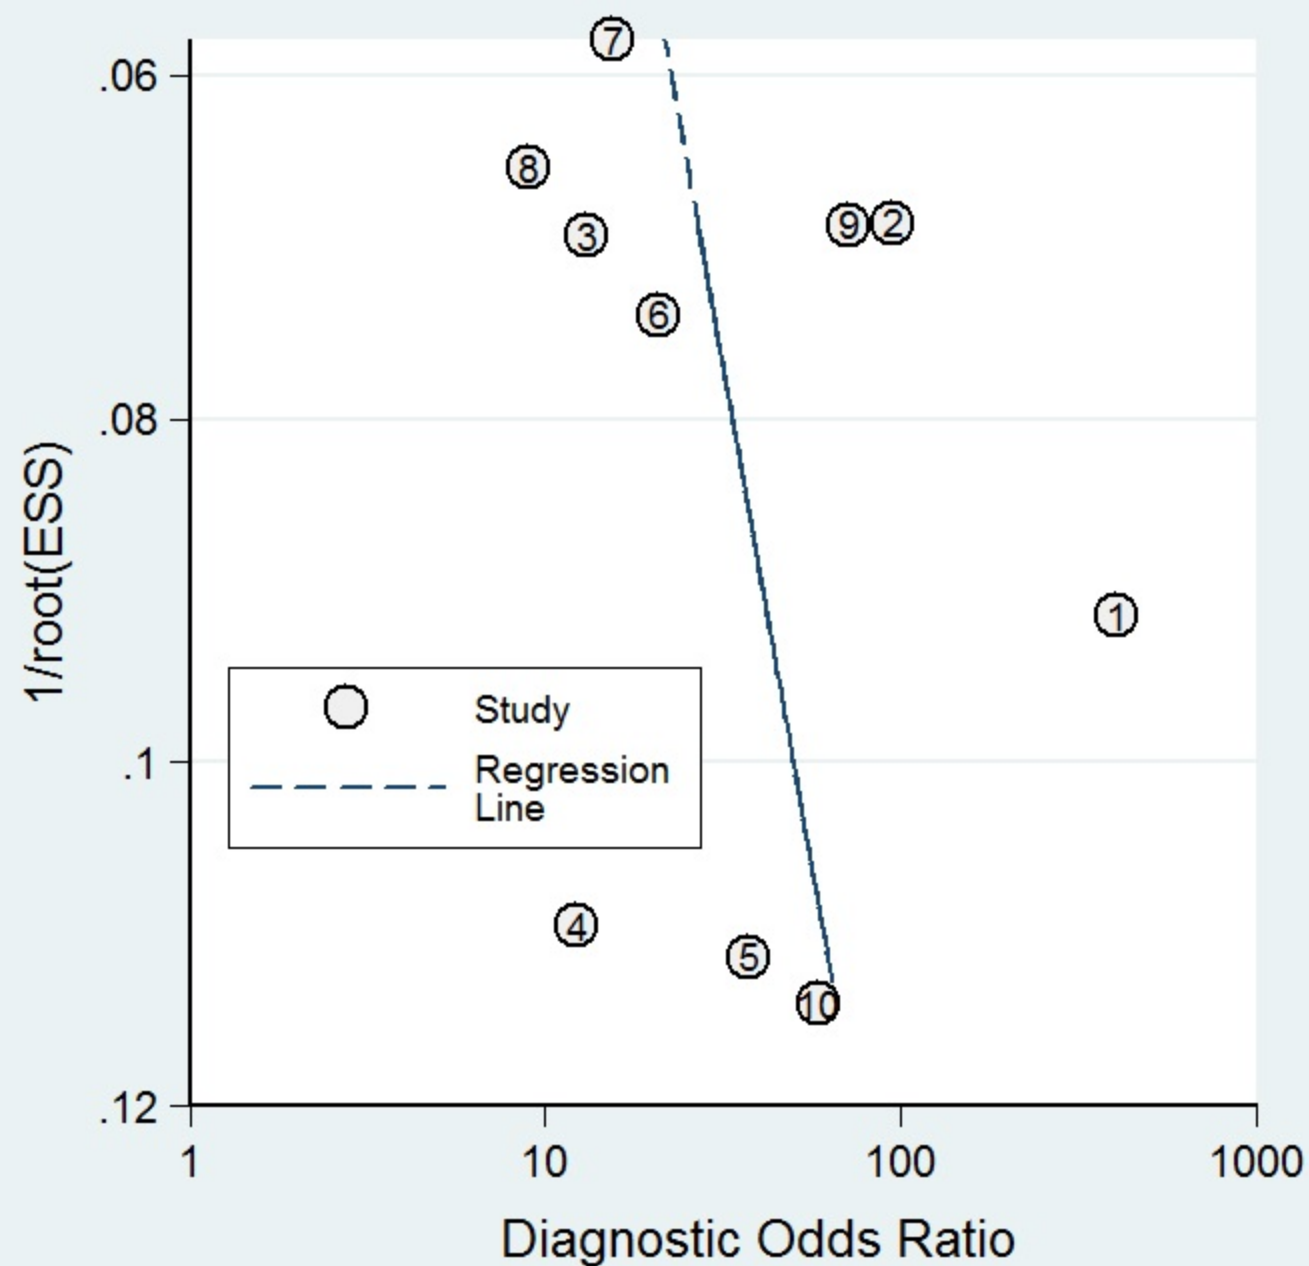

Supplement: Supplementary file 1 [file 15102842]
